# Supplementary material for: Flexible paper-based label-free electrochemical biosensor for the monitoring of miRNA-21 using core–shell Ag@Au/GQD nano-ink: a new platform for the accurate and rapid analysis by low cost lab-on-paper technology
Source: Royal Society of Chemistry journal article supplement (doi:10.1039/d1ay00142f), 2021-01-01
Supplement: d1ay00142f5.pdf [file d1ay00142f5.pdf]

## Supporting Information

### Flexible paper-based label-free electrochemical biosensor for monitoring miRNA-21 using core-shell Ag@Au/GQDs nano-ink

Fatemeh Farshchi <sup>a1</sup>, Arezoo Saadati <sup>b1</sup>, Nazanin Fathi <sup>c</sup>, Mohammad Hasanzadeh <sup>a,\*</sup>,  
Mohammad Samiei <sup>d,\*\*</sup>

<sup>a</sup> Pharmaceutical Analysis Research Center, Tabriz University of Medical Sciences, Tabriz, Iran.

<sup>b</sup> Food and Drug Safety Research Center, Tabriz University of Medical Sciences, Tabriz, Iran.

<sup>c</sup> Research Center for Immunodeficiencies, Pediatrics Center of Excellence, Children's Medical Center, Tehran University of Medical Sciences, Tehran, Iran.

<sup>d</sup> Faculty of Dentistry, Tabriz University of Medical Sciences, Tabriz, Iran

#### Corresponding author (s)

(\*) **Mohammad Hasanzadeh**

Pharmaceutical Analysis Research Center, Tabriz University of Medical Sciences, Tabriz, Iran.

[hasanzadehm@tbzmed.ac.ir](mailto:hasanzadehm@tbzmed.ac.ir)

(\*\*) **Mohammad Samiei**

[samiei.moh@gmail.com](mailto:samiei.moh@gmail.com)

Faculty of Dentistry, Tabriz University of Medical Sciences, Tabriz, Iran

(1) Co first author

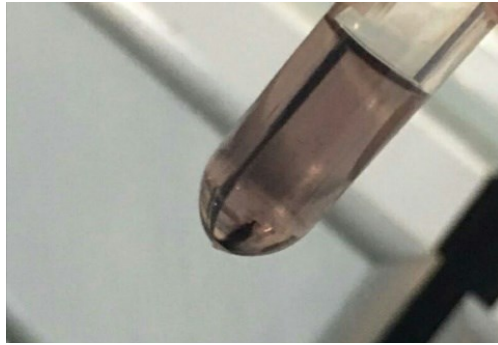

**Fig. S1.** Photographic image of Ag@Au core-shell NPs after centrifugation.

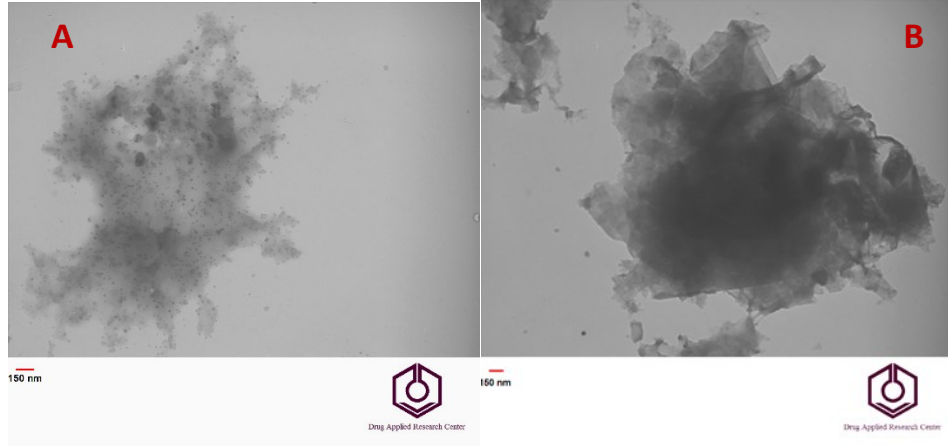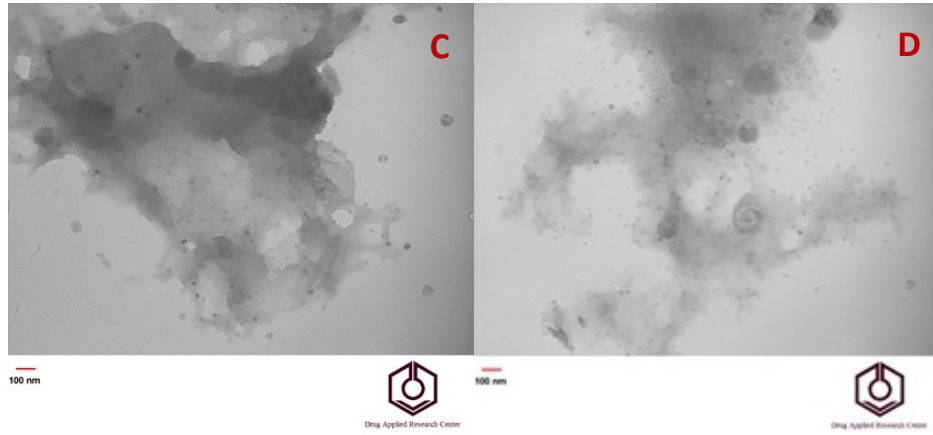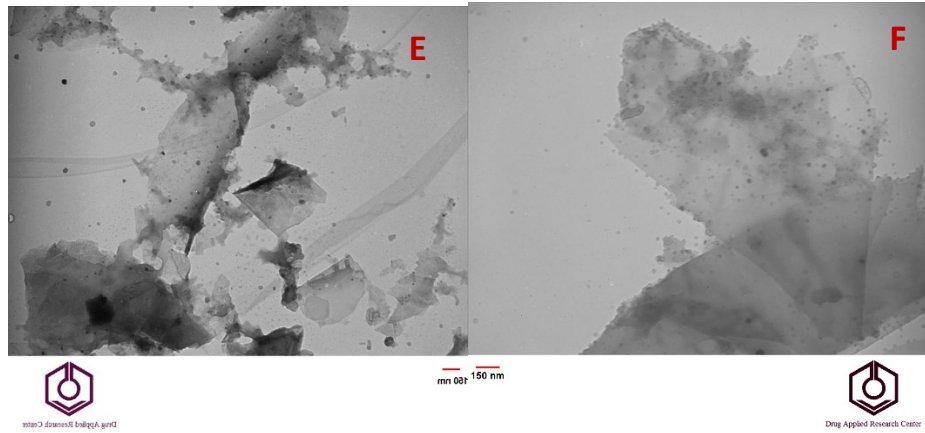

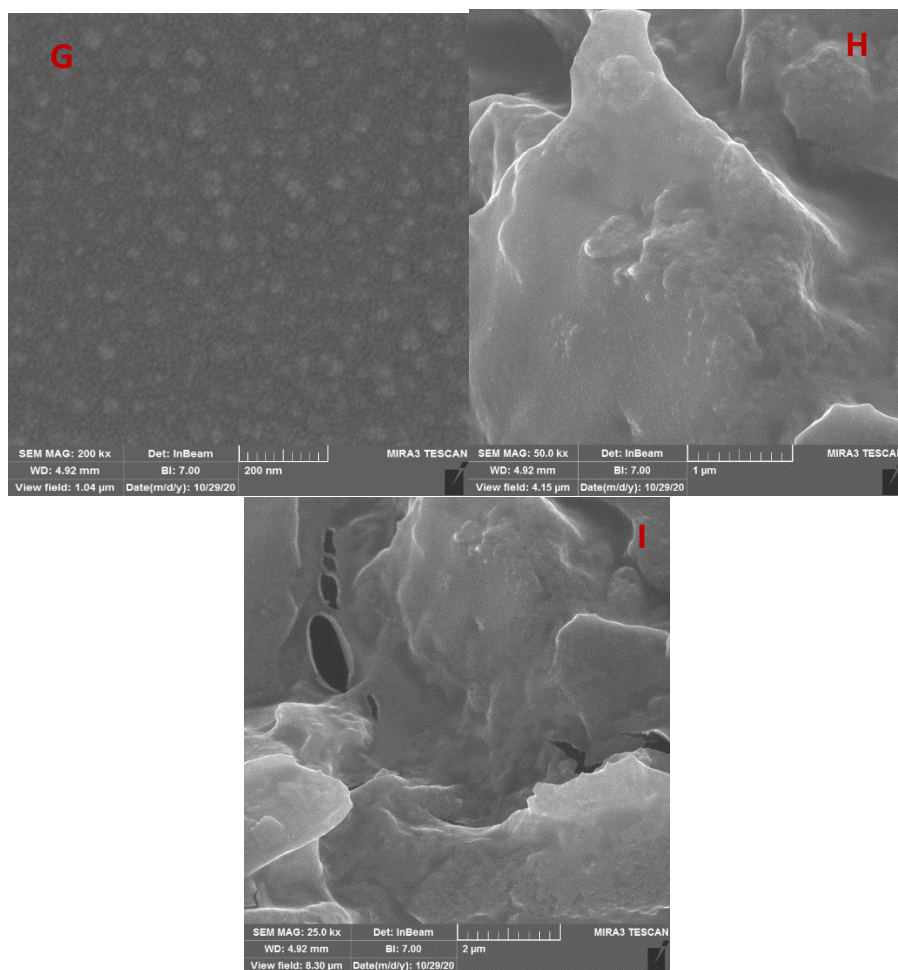

**Fig. S2. A-F)** TEM images of prepared Ag@Au core-shell/GQDs nano-ink, **G-I)** FE-SEM images of prepared nano-ink in different exaggerations.

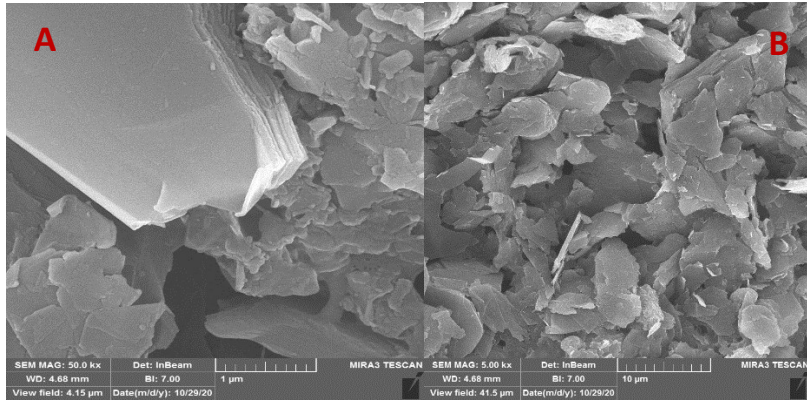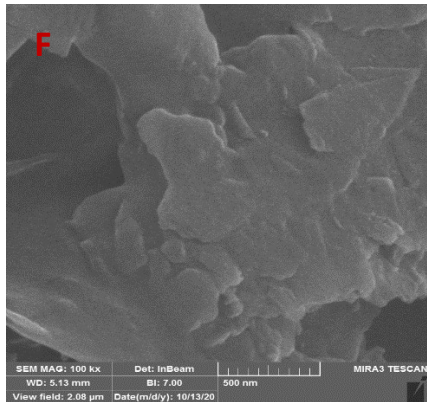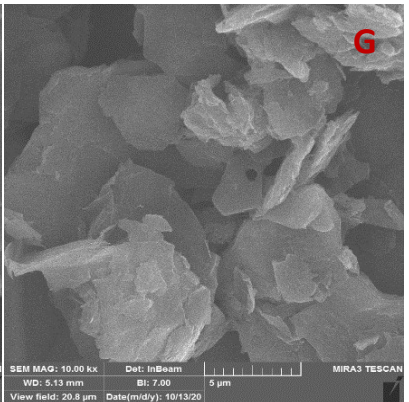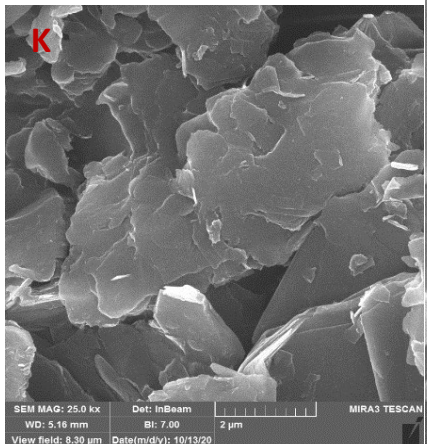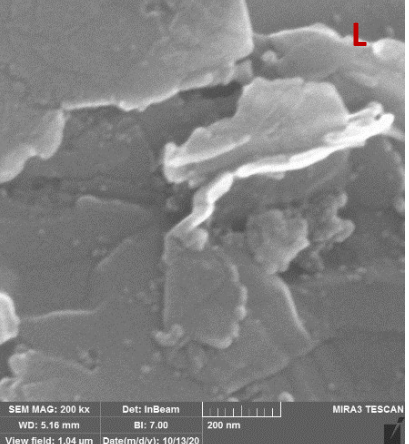

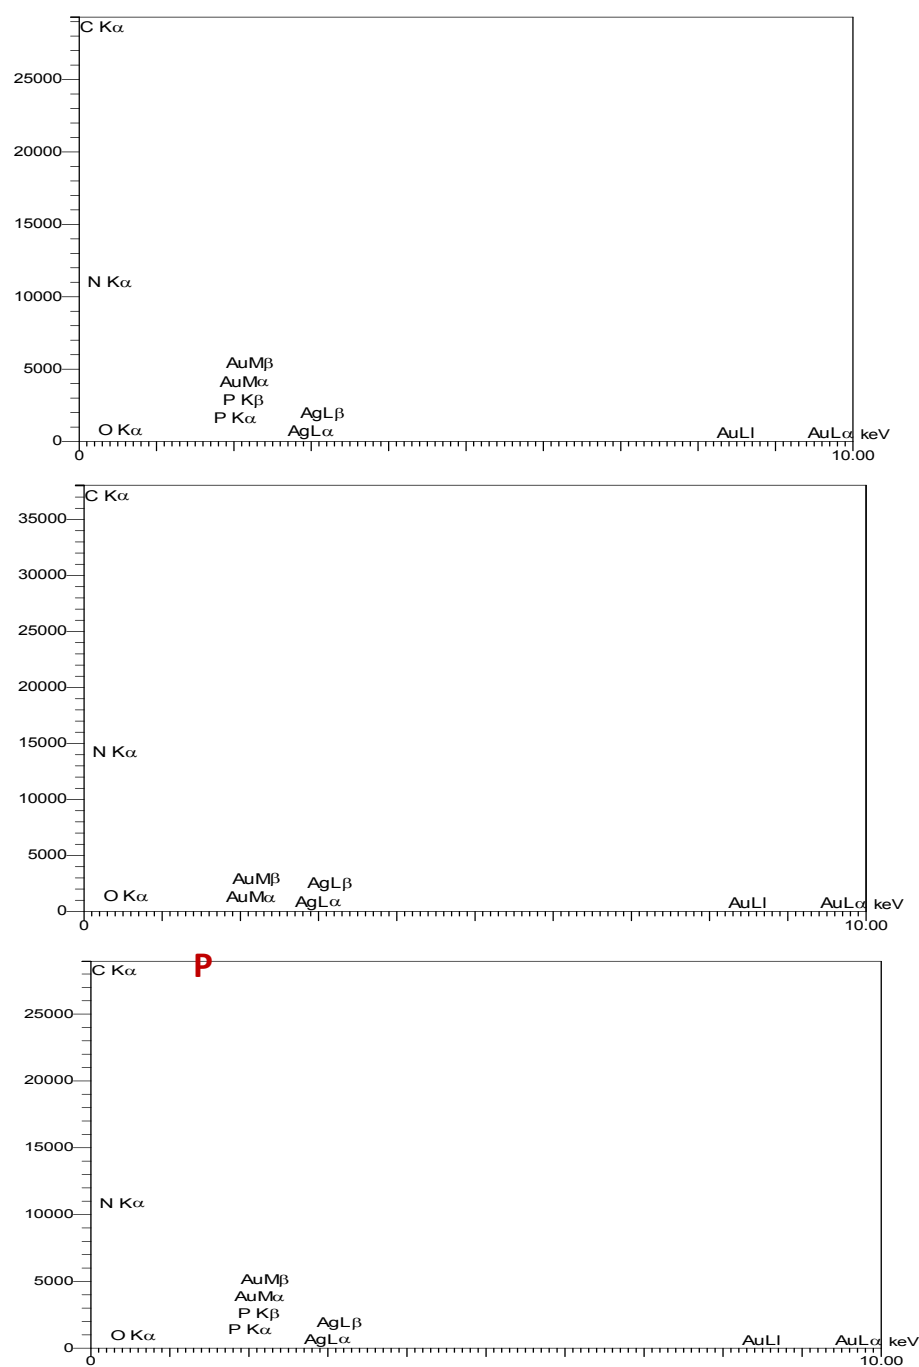

**Fig.S3.** (A-E) FE-SEM images of the Ag@Au core-shell/GQDs nano-ink on the surface of photographic paper. (F-J) FE-SEM images of the PNA-T9/Ag@Au core-shell/GQDs nano-ink on the surface of photographic paper, (K-O) FE-SEM images of the mi-RNA21/ MCE/ PNA-T9/Ag@Au core-shell/GQDs/ nano-ink on the surface of photographic paper (P) EDC images of the Ag@Au core-shell/GQDs nano-ink. (Q) EDC images of the PNA-T9/ Ag@Au core-shell/GQDs nano-ink, (R) EDC images of the mi-RNA21/PNA-T9/MCE/Ag@Au core-shell/GQDs nano-ink deposited on the surface of paper electrode.

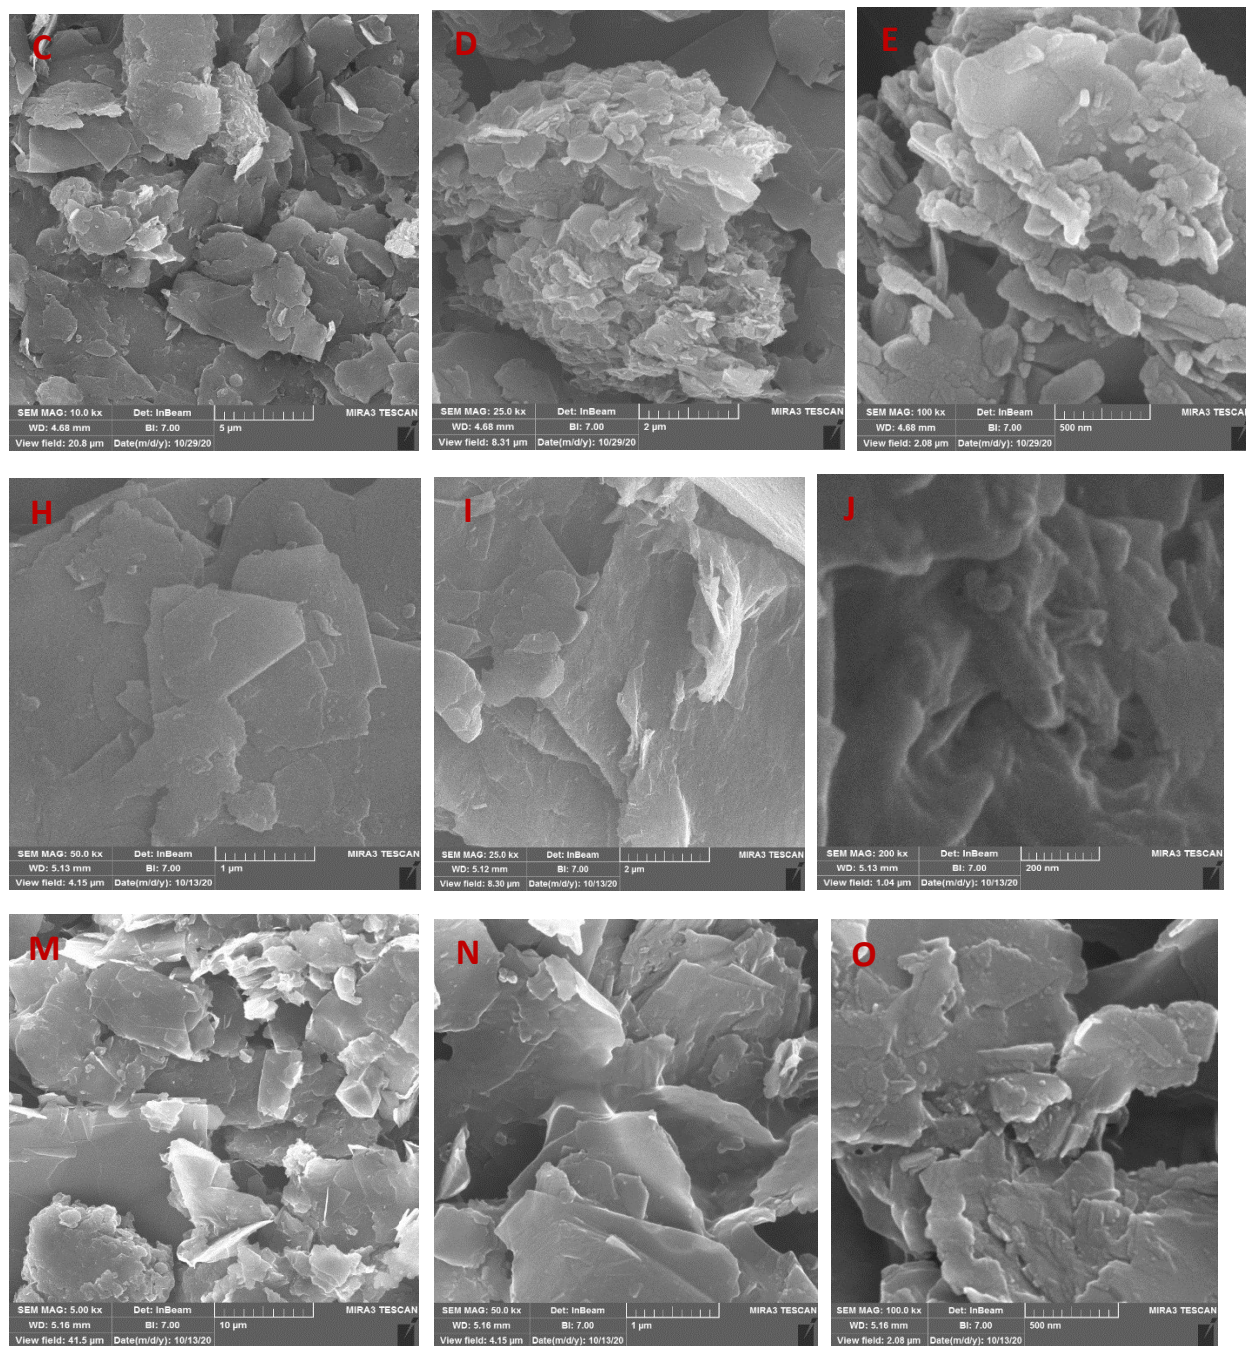

**Fig. S4.** (A-E) FE-SEM images of the Ag@Au core-shell/GQDs nano-ink on the surface of photographic paper. (F-J) FE-SEM images of the PNA-T9/Ag@Au core-shell/GQDs nano-ink on the surface of photographic paper, (K-O) FE-SEM images of the mi-RNA21/ MCE/ PNA-T9/Ag@Au core-shell/GQDs/ nano-ink on the surface of photographic paper.

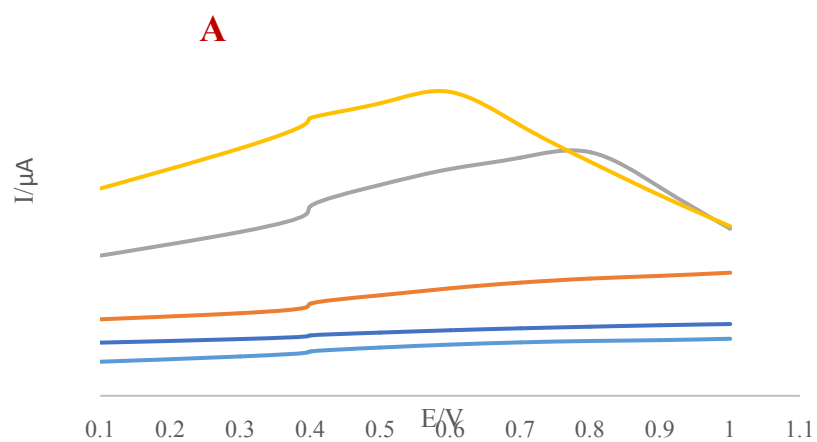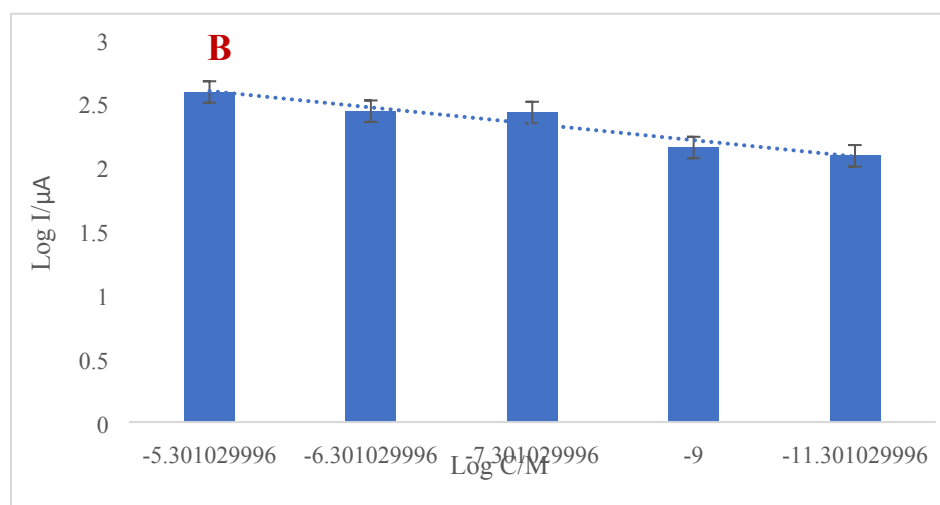

**Fig. S5.A)** SWVs (stop potential = 0.1 V, frequency = 1.0 Hz) of the engineered PNA-based biosensor for analysis of different concentrations of miRNA-21 in human plasma specimens. **B)** Calibration curves (n=5, SD=2.36).



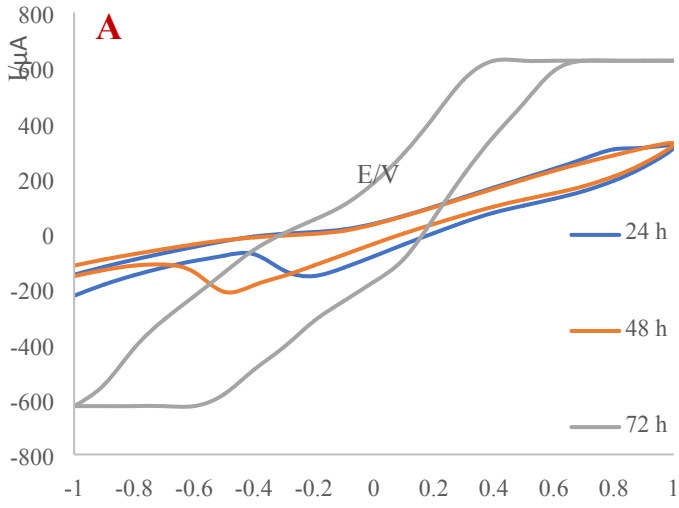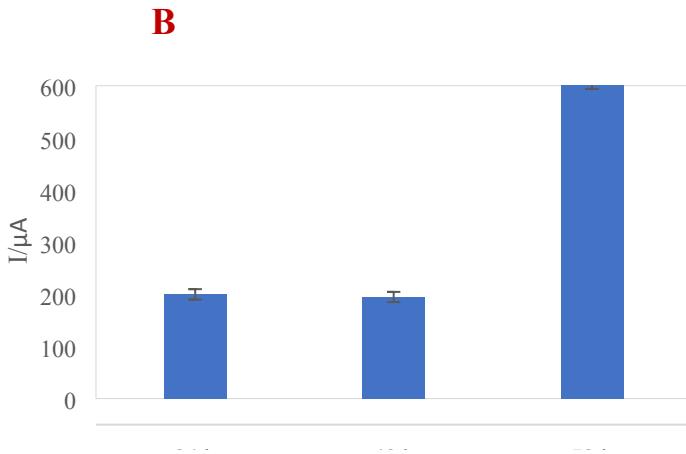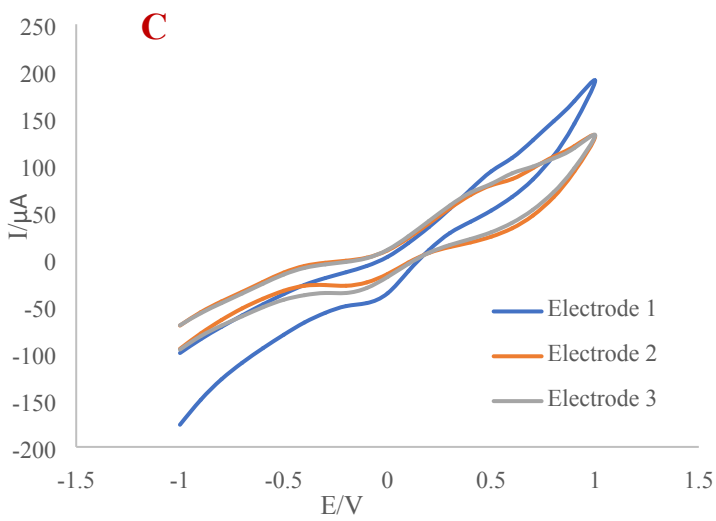

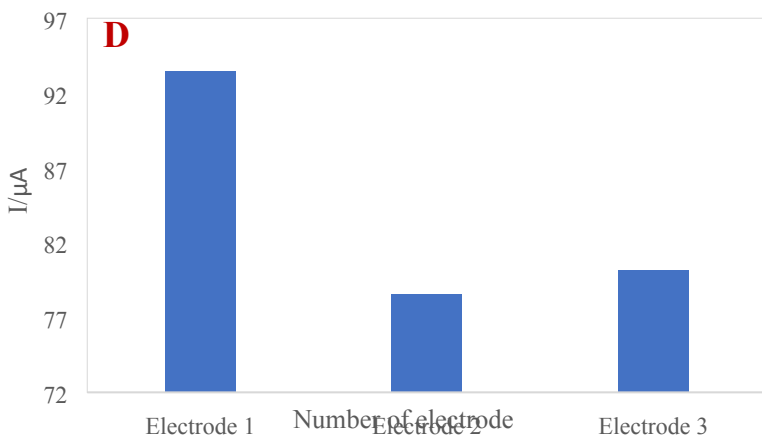

**Fig. S6.A)** CVs **B)** Histogram of intraday stability of PNA-T9/Ag@Au core-shell/GQDs nano-ink **C)** Inter-electrode reproducibility and **D)** Corresponding histogram chart of Ag@Au core-shell/GQDs nano-ink on the surface of photographic paper in 0.01M  $[\text{Fe}(\text{CN})_6]^{3-/4-}/\text{KCl}$  solution as supporting electrolyte (Potential range= -1 to +1 V and scan rate= 10 mV/s). (n=3, SD=2.09).

**Table. S1;** Comparison of the performance and sensitivity of the designed biosensor for detecting of miRNA-21.

| Detection method                                | Used materials                                                                                     | Linear area                                               | LLOQ                                   | Ref       |
|-------------------------------------------------|----------------------------------------------------------------------------------------------------|-----------------------------------------------------------|----------------------------------------|-----------|
| Electrochemical (DPV)                           | three-dimensional (3D) DNA tetrahedron-structured probes (TSPs) and duplex-specific nuclease (DSN) | 0.1 fM-0.1 pM                                             | 0.04 fM                                | 34        |
| Electrochemical (DPV)                           | hairpin H1 was hybridized with miR-21 in CHA and RCA                                               | 0.5-12 500 p.mol                                          | 290 f.mol                              | 35        |
| Amperometry (H <sub>2</sub> O <sub>2</sub> -HQ) | AuNPs/SPCE                                                                                         | 0.096-25 pM                                               | 29 fM                                  | 36        |
| Smartphone-based electrochemical biosensing     | reduced graphene oxide/gold (rGO/Au) composite                                                     | 1 × 10 <sup>-4</sup> M-1 × 10 <sup>-12</sup> M            | 1 × 10 <sup>-4</sup> M                 | 37        |
| Florescence                                     | nanosized graphene oxide (NGO)                                                                     | 10 <sup>-14</sup> -10 <sup>-12</sup> mol. L <sup>-1</sup> | 10 <sup>-12</sup> mol. L <sup>-1</sup> | 38        |
| Fluorescence                                    | Nano metal–organic framework (NMOF)                                                                | 0- 1000 nM                                                | 10 pM                                  | 39        |
| Electrochemical (ChA)                           | Ag@Au core-shell/GQDs nano-ink                                                                     | 5μM - 5pM                                                 | 5pM                                    | This work |
